# Supplementary material for: Complexation of specific residues by carboxylatopillar[6]arene for improving the zymolytic stability of arginine-containing peptides
Source: Royal Society of Chemistry journal article supplement (doi:10.1039/d2ob00017b), 2022-01-01
Supplement: d2ob00017b1.pdf [file d2ob00017b1.pdf]

## Supporting information

### **Complexation of specific residues by Carboxylatopillar[6]arene for improving zymolytic stability of arginine-containing peptides**

Longming Chen,<sup>‡a</sup> Zhao Meng,<sup>‡a</sup> Long Tian,<sup>a</sup> Yahan Zhang,<sup>a</sup> Liang Zhao,<sup>a</sup> Xinbei Du,<sup>a</sup> Mengke Ma,<sup>a</sup> Han Zhang,<sup>a</sup> Junyi Chen,<sup>\*ab</sup> and Qingbin Meng,<sup>\*a</sup>

<sup>a</sup> *State Key Laboratory of Toxicology and Medical Countermeasures, Beijing Institute of Pharmacology and Toxicology, Beijing 100850, P. R. China*

<sup>b</sup> *Key Laboratory of Inorganic-Organic Hybrid Functional Material Chemistry, Ministry of Education, Tianjin Key Laboratory of Structure and Performance for Functional Molecules, College of Chemistry, Tianjin Normal University, Tianjin 300387, P. R. China*

# Table of Contents

|                                                                   |     |
|-------------------------------------------------------------------|-----|
| <b>1 General materials and methods</b>                            | S2  |
| 1.1 Materials                                                     | S2  |
| 1.2 Cells                                                         | S2  |
| 1.3 Instruments                                                   | S2  |
| 1.4 NMR spectroscopy                                              | S2  |
| 1.5 Fluorescence titration                                        | S2  |
| 1.6 Metabolic stability                                           | S3  |
| <b>2 Synthesis of CP6A and peptides</b>                           | S4  |
| 2.1 Synthesis of CP6A                                             | S4  |
| 2.2 Synthesis of peptides                                         | S5  |
| 2.3 The structures of peptides                                    | S6  |
| <b>3 Supporting results and experimental raw data</b>             | S7  |
| 3.1 Characterization of CP6A and peptides                         | S7  |
| 3.2 Binding of CP6A with other 19 naturally occurring amino acids | S14 |
| 3.3 Binding of CP6A with Ang I II and Cpep I II III               | S24 |
| 3.4 Optimized geometries of Arg with CP6A                         | S26 |
| <b>4 The standard curves of Ang III as studied by HPLC</b>        | S27 |
| <b>References</b>                                                 | S28 |

## 1 General materials and methods

**1.1 Materials** All reagents were purchased commercially and used as received unless otherwise specified purification. DMSO, methanol, acetonitrile and Dulbecco's modified Eagle medium (DMEM) were purchased from the Thermo Fisher Scientific. Fetal bovine serum (FBS) was purchased from Invitrogen. The Cell Counting Kit-8 (CCK-8) was purchased from Dojindo. VSMCs cell line was purchased from cell bank of Chinese Academy of Science. The Cell Counting Kit-8 (CCK-8) was purchased from Dojindo. N-Fluorenyl-9-methoxycarbonyl (Fmoc)-protected L- amino acids were purchased from GL Biochem Ltd and CS Bio Ltd (Shanghai, China). Diisopropylethylamine, trifluoroacetic acid (TFA), thioanisole, ethandithiol and anisole were purchased from J & K Scientific (Beijing, China).

**1.2 Cells.** L929 cells were cultured in F12K supplemented with 10% FBS, 1% penicillin and 1% streptomycin. Then cells were incubated at 37 °C under 5% CO<sub>2</sub> and 90% relative humidity, and passaged every 2 days.

**1.3 Instruments.** <sup>1</sup>H NMR spectrum were recorded using a JNM-ECA-400 spectrometer. Fluorescence spectroscopic studies were carried out using a FL-6500 fluorescence spectrophotometer, Perkin Elmer Co. Ltd. Peptides were synthesized by solid-phase synthesis using Fmoc chemistry on an automatic Liberty-12-Channel Automated Peptide Synthesizer with an integrated microwave system (CEM, USA). Peptides were purified by reversed-phase high-performance liquid chromatography (HPLC) using a C8 column (Waters USA). Molecular weights (MWs) of peptides were analysed by matrix-assisted laser desorption/ionization time-of-flight mass spectrometry (MALDI-TOF-MS; BrukerReex, BrukerDaltonics, Inc., CA, USA).

**1.4 NMR spectroscopy.** Samples for 1:1 <sup>1</sup>H NMR spectra were prepared in D<sub>2</sub>O. All NMR spectra were acquired at 298 K in the solution state.

**1.5 Fluorescence titration.** The fluorescence titration was carried out in 10 mM phosphate buffer solution at pH 7.4. The complexations of CP6A with amino acids and peptides were performed by competitive fluorescence titrations. A mixed solution contained AO (1.0 μM) and CP6A (2.5 μM) and a competitive guest was gradually

added into 2.0 mL AO (1.0  $\mu\text{M}$ )/CP6A (2.5  $\mu\text{M}$ ) solution in a quartz cuvette. The fluorescence intensity was measured ( $\lambda_{\text{ex}} = 493 \text{ nm}$ ,  $\lambda_{\text{em}} = 530 \text{ nm}$ ) after adding the guests. The data were well fitted by the 1:1 binding stoichiometry.<sup>1</sup>

**1.6 Metabolic stability.** All samples were precipitated with acetonitrile by direct protein precipitation method and analyzed by HPLC. Free angiotensin III (Ang III), 1:1 mixture of Ang III/CP6A (containing 1.00 mM Ang III) were dissolved in the phosphate buffer solution (PBS), and then incubated with equal amount of trypsin (1  $\text{mg}\cdot\text{mL}^{-1}$ ) at 37  $^{\circ}\text{C}$ . At predetermined intervals, 100  $\mu\text{L}$  samples were withdrawn and quenched with 100  $\mu\text{L}$  acetonitrile. After centrifugation at 4000 rpm for 10 min, the supernatant was collected and stored at 4  $^{\circ}\text{C}$  until HPLC analysis. HPLC analysis was performed on an LC-20AT liquid chromatography system with an SPD-20A UV-vis detector operating at 210 nm and quantified using Shimadzu LC solution Lite. The column used was a C8 reverse-phase column (SHISEDO, 4.6 \* 250 nm), the mobile phase was composed of solvent A (water containing 0.1% TFA) and solvent B (70% acetonitrile and 0.1% TFA). The injection volume and flow rate were set as 20  $\mu\text{L}$  and 1.00  $\text{mL}\cdot\text{min}^{-1}$ .<sup>2</sup>

## 2 Synthesis of CP6A and peptides.

### 2.1 Synthesis of CP6A

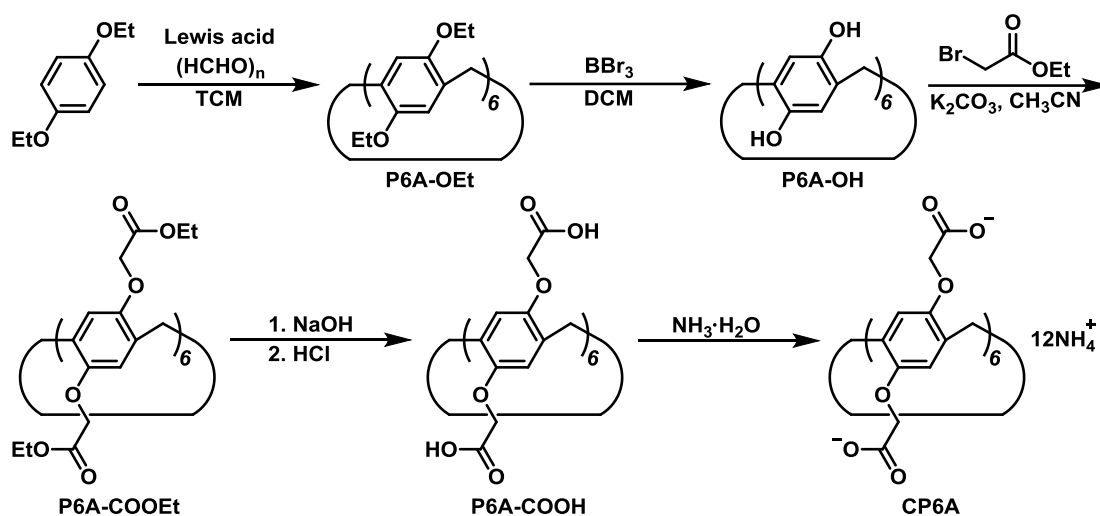

**Scheme S1.** Synthetic route of CP6A.

Carboxylatopillar[6]arene (CP6A) was synthesized and purified according to our previously reported procedure.<sup>3</sup>

## 2.2 Synthesis of peptides

All peptides were synthesized by solid-phase synthesis using Fmoc chemistry on an automatic Liberty-12-Channel Automated Peptide Synthesizer with an integrated microwave system (CEM, USA). Rink amide resin ( $0.44 \text{ mmol}\cdot\text{g}^{-1}$ ) was used as a solid phase to obtain C-terminally amidated peptides. A 20% solution of piperidine in N, N-dimethylformamide (v/v) was added to the resin for deprotection. Amino acids were coupled to rink amide resin one by one, followed by N-terminal conjugation of stearic acid. The final cleavage was performed using 10 mL of TFA (90%)/thioanisole (5%)/ethanedithiol (3%)/anisole (2%) for 3 h at room temperature. Peptides were purified by reversed-phase high-performance liquid chromatography (RP-HPLC) using a C8 column (Waters, USA) and a gradient of acetonitrile and deionized water containing 0.1% (v/v) TFA. Molecular weights (MWs) of peptides were analysed by matrix-assisted laser desorption/ionization time-of-flight mass spectrometry (MALDI-TOF-MS and electron spray ionization (ESI) mass spectrometry; BrukerReex, BrukerDaltonics, Inc., CA, USA).<sup>4</sup>

**Table S1. Sequence of peptide and molecular weight of peptides**

| Compound | Peptide sequence | Molecular Weight |          |
|----------|------------------|------------------|----------|
|          |                  | Calculated       | Measured |
| Ang I    | DRVYIHPFHL       | 1296.4990        | 1296.70  |
| Ang II   | DRVYIHPF         | 1046.1970        | 1046.54  |
| Ang III  | RVYIHPF          | 931.1090         | 931.48   |
| Cpep I   | GRVYIHPFHL       | 1238.4630        | 1238.316 |
| Cpep II  | GRVYIHPF         | 988.1610         | 988.53   |
| Cpep III | GVYIHPF          | 831.9720         | 832.44   |

## 2.3 The structures of peptides

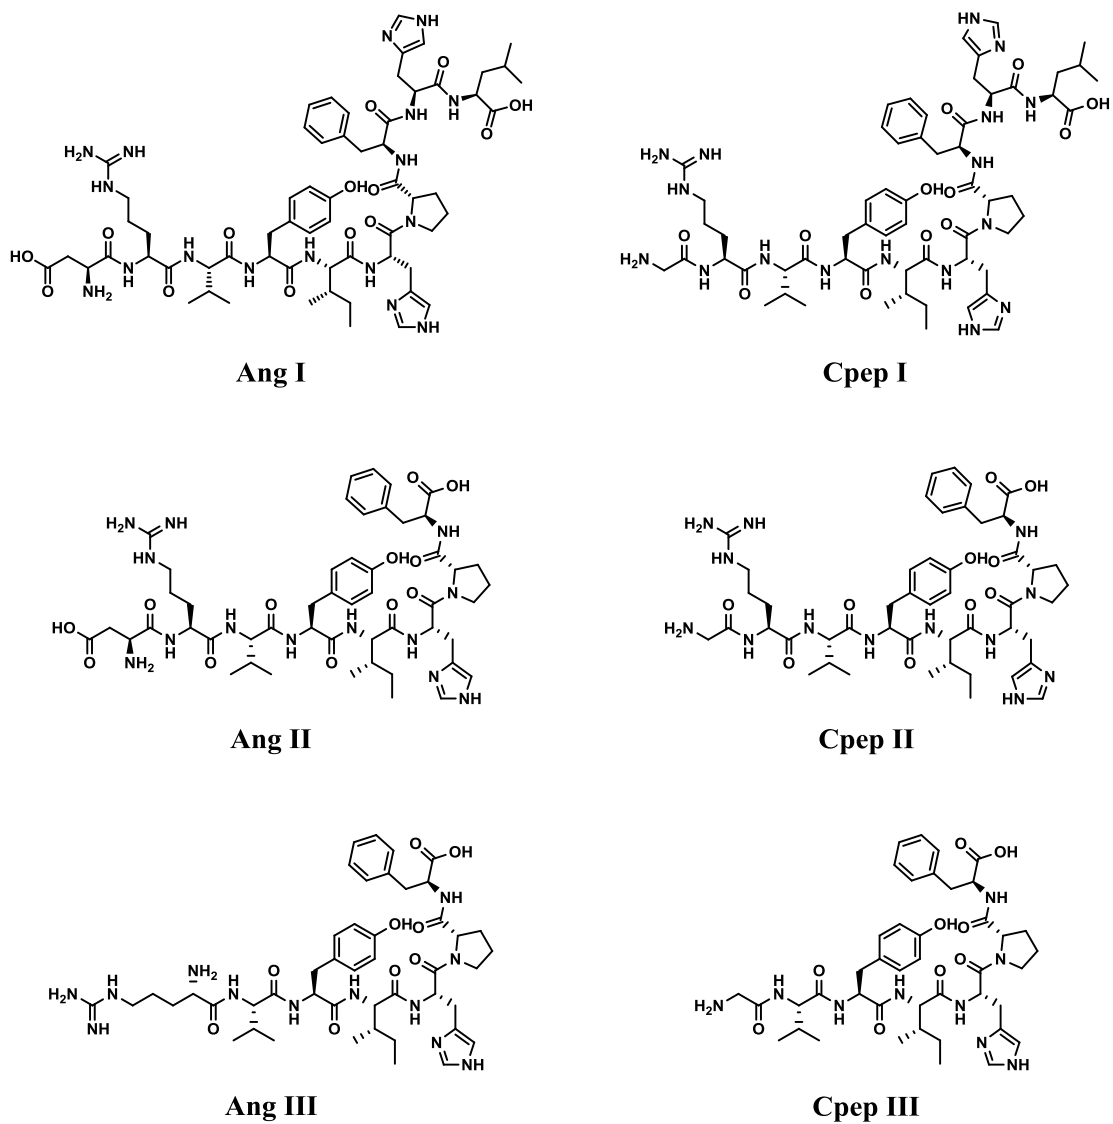

**Scheme 2** The chemical structures of angiotensin peptides and three control peptides..

### 3 Supporting results and experimental raw data

#### 3.1 Characterization of CP6A and peptides

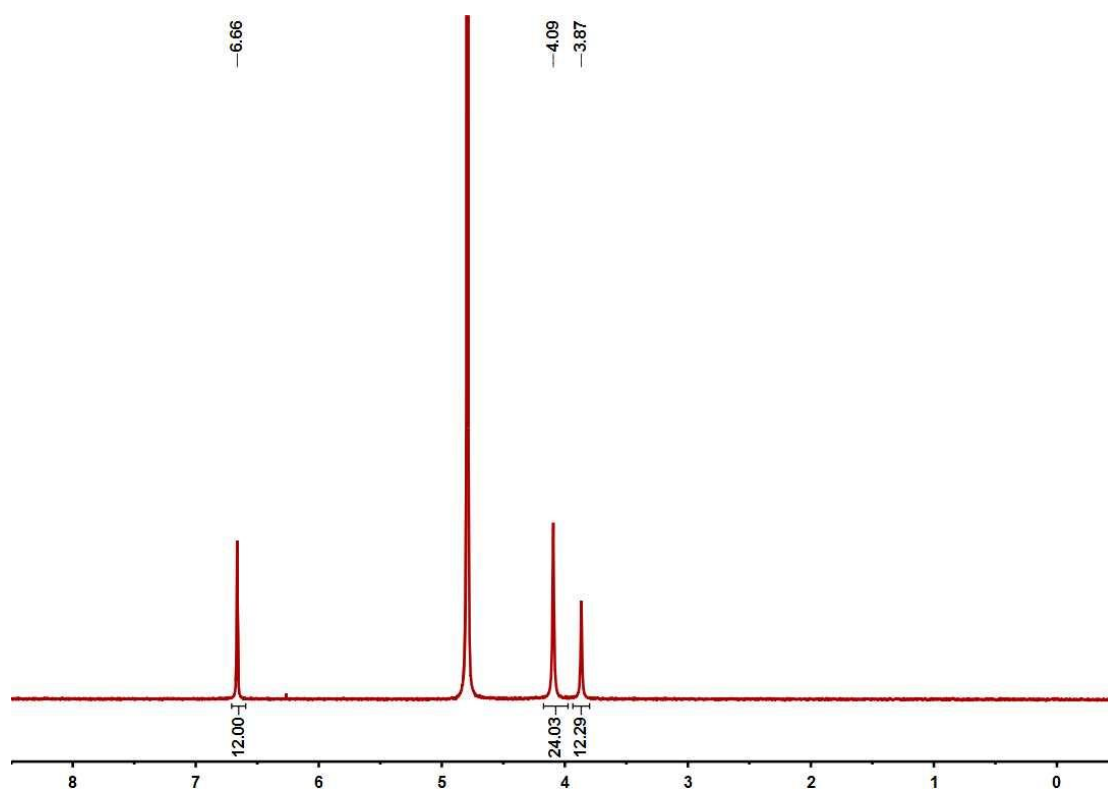

Fig. S1. <sup>1</sup>H NMR spectrum of CP6A in D<sub>2</sub>O, 400 MHz.

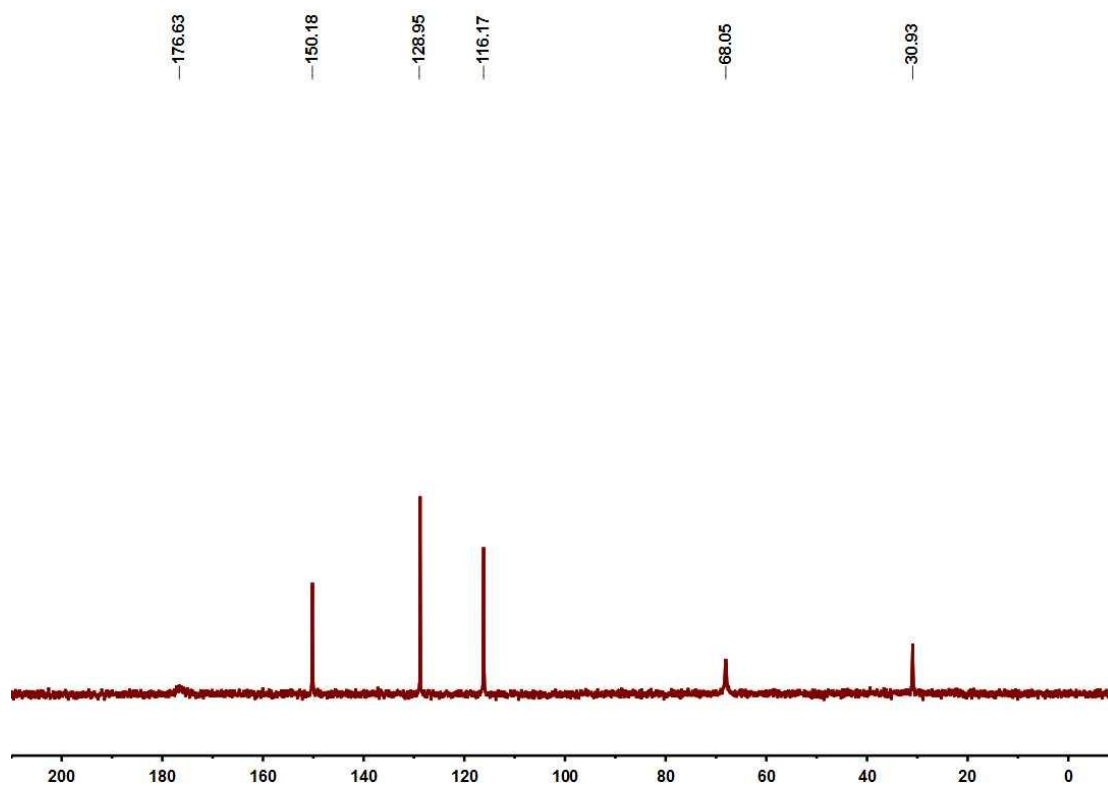

Fig. S2. <sup>13</sup>C NMR spectrum of CP6A in D<sub>2</sub>O, 100 MHz.



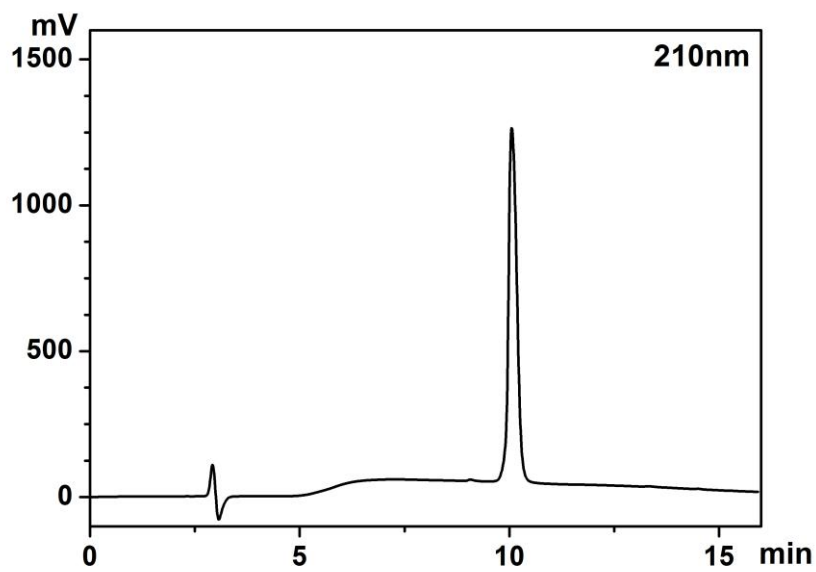

**Fig. S3.** RP-HPLC of Ang I.

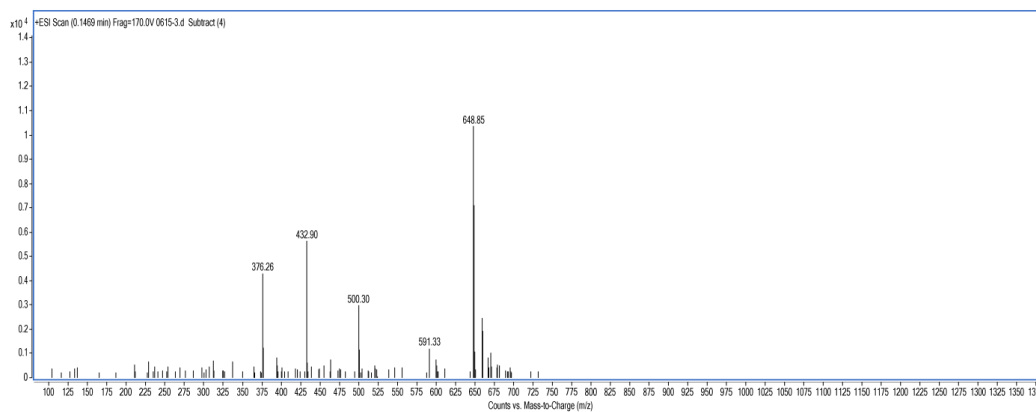

**Fig. S4.** ESI mass spectrum of Ang I.

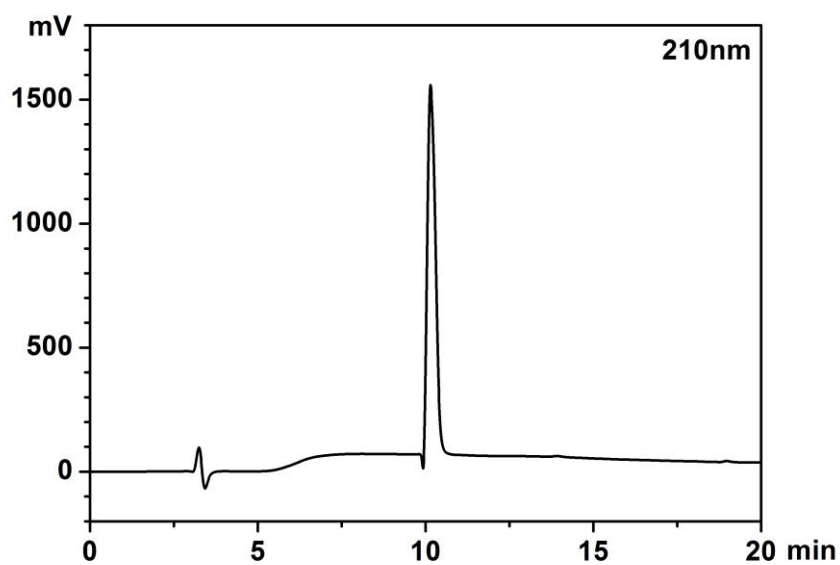

**Fig. S5.** RP-HPLC of Ang II.

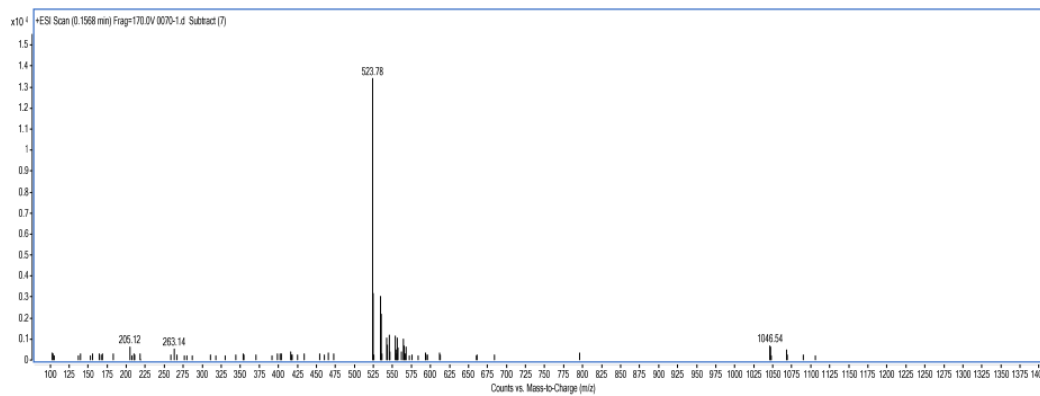

**Fig. S6.** ESI mass spectrum of Ang II.

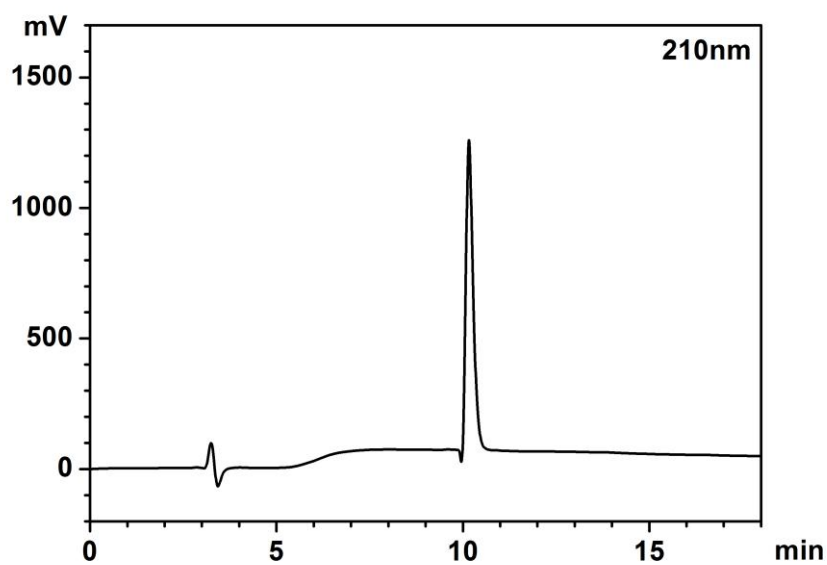

**Fig. S7.** RP-HPLC of Ang III.

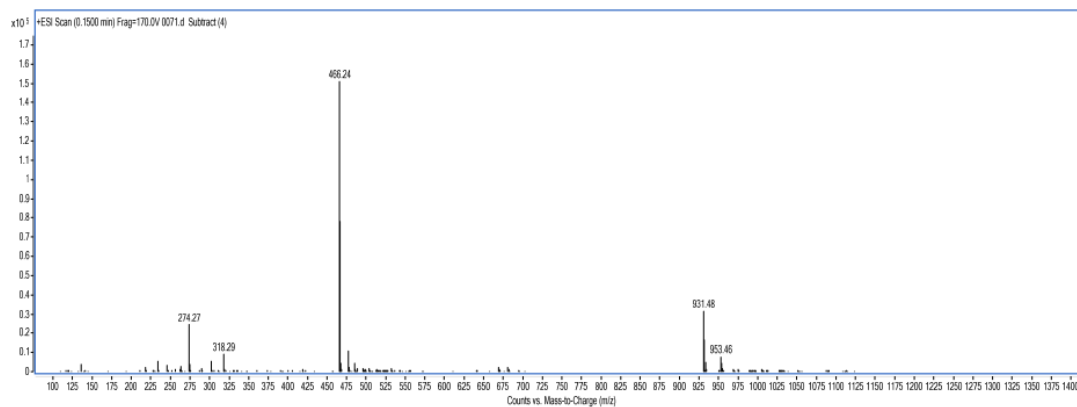

**Fig. S8.** ESI mass spectrum of Ang III.

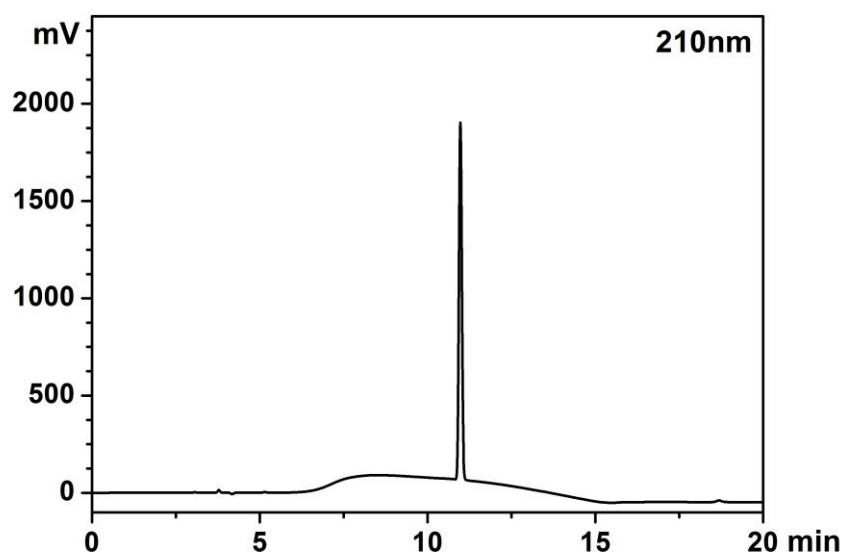

**Fig. S9.** RP-HPLC of Cpep I.

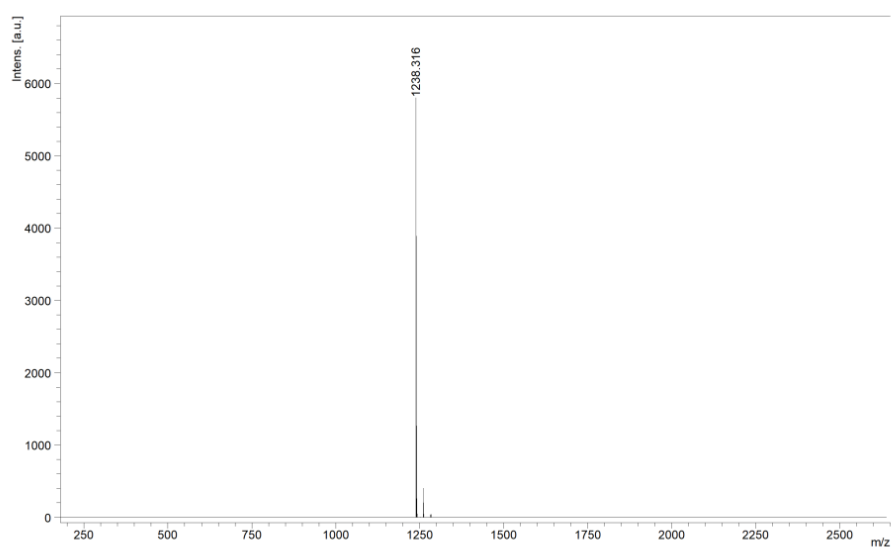

**Fig. S10.** MALDI-TOF mass spectrum of Cpep I.

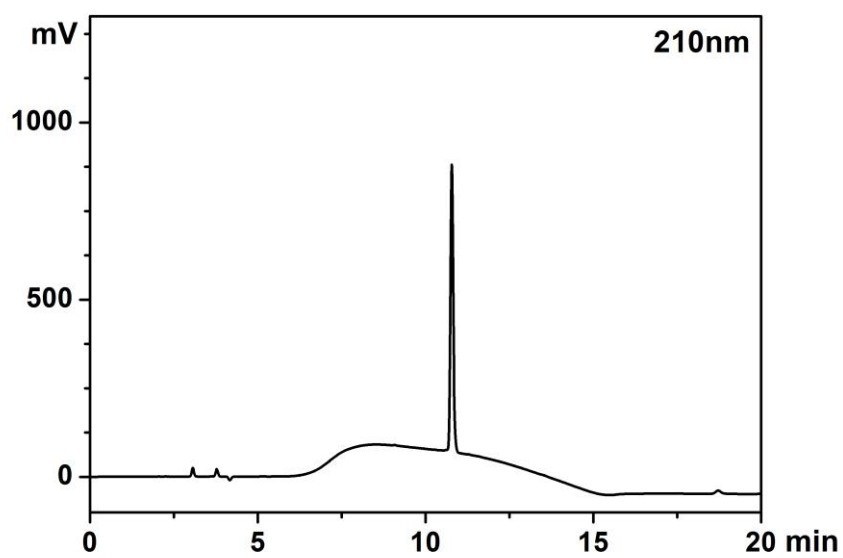

**Fig. S11.** RP-HPLC of Cpep II.

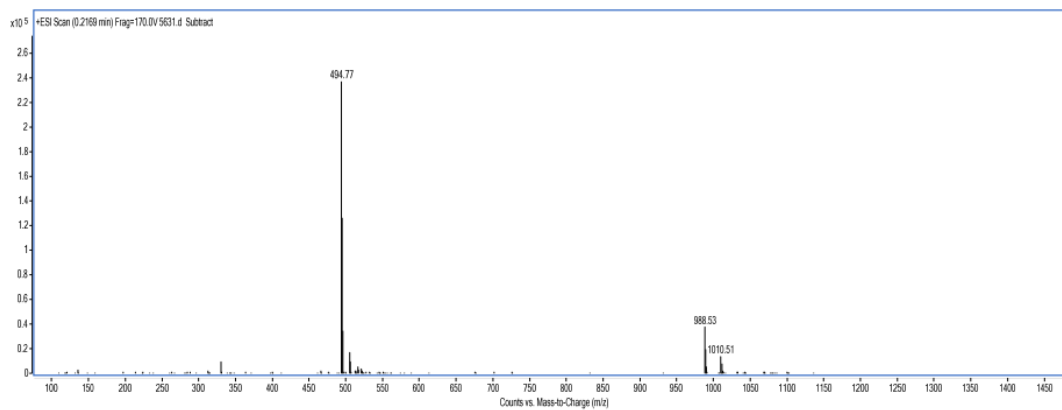

**Fig. S12.** ESI mass spectrum of Cpep II.

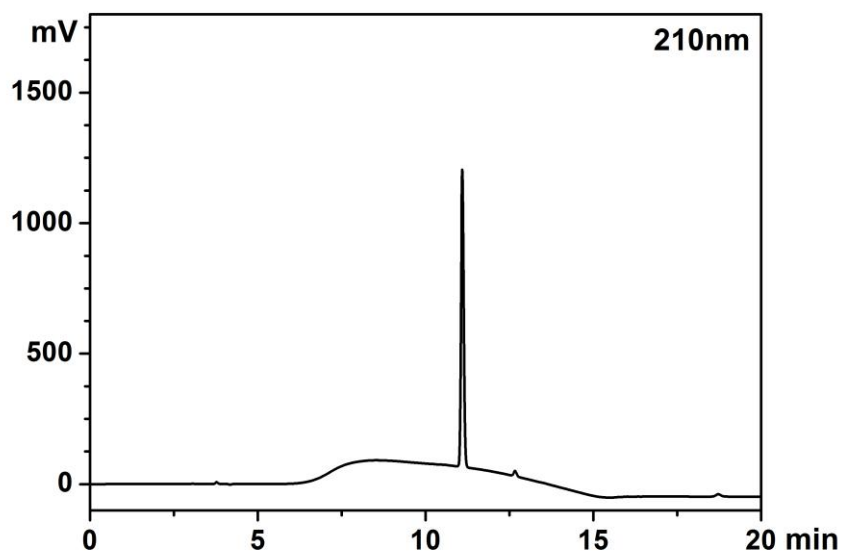

**Fig. S13.** RP-HPLC of Cpep III.

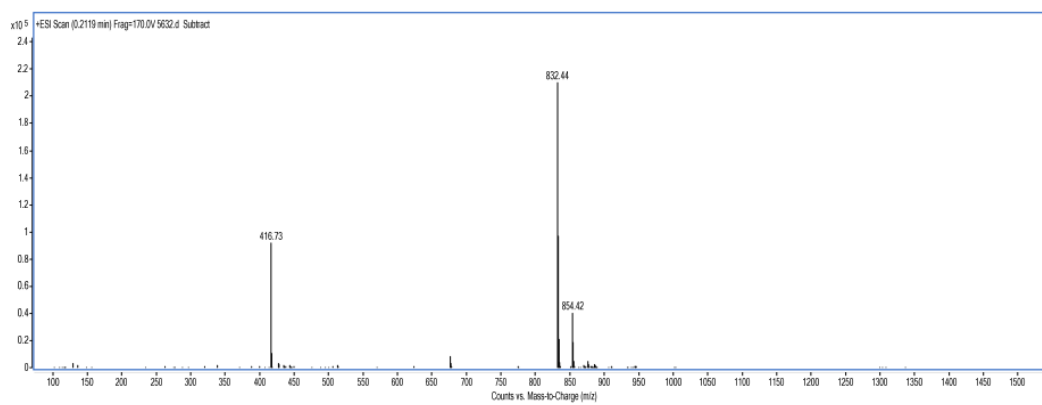

**Fig. S14.** ESI mass spectrum of Cpep III.

### 3.2 Binding of CP6A with other 19 naturally occurring amino acids.

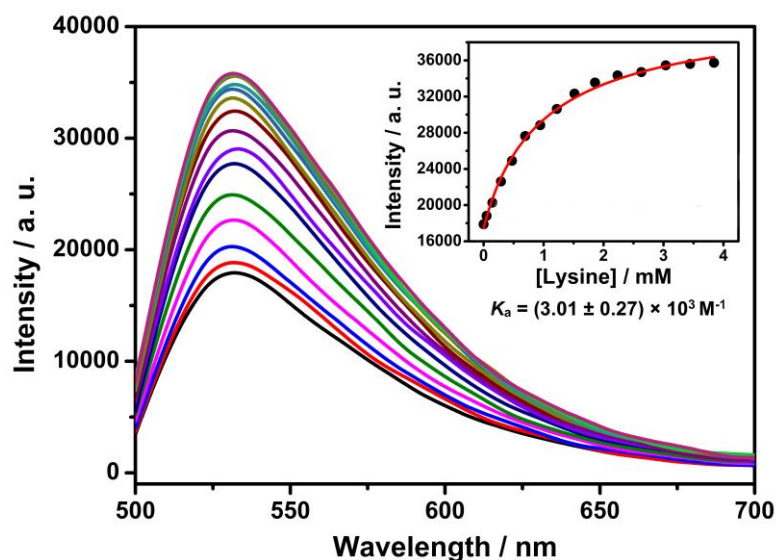

**Fig. S15.** Competitive fluorescence titration of lysine in the presence of AO (1.0  $\mu\text{M}$ )/CP6A (2.5  $\mu\text{M}$ ) in 10 mM PBS buffer at pH 7.4,  $\lambda_{\text{ex}} = 493 \text{ nm}$ . Insert: the associated competitive titration curve at  $\lambda_{\text{em}} = 530 \text{ nm}$  and fit according a 1:1 competitive binding model.

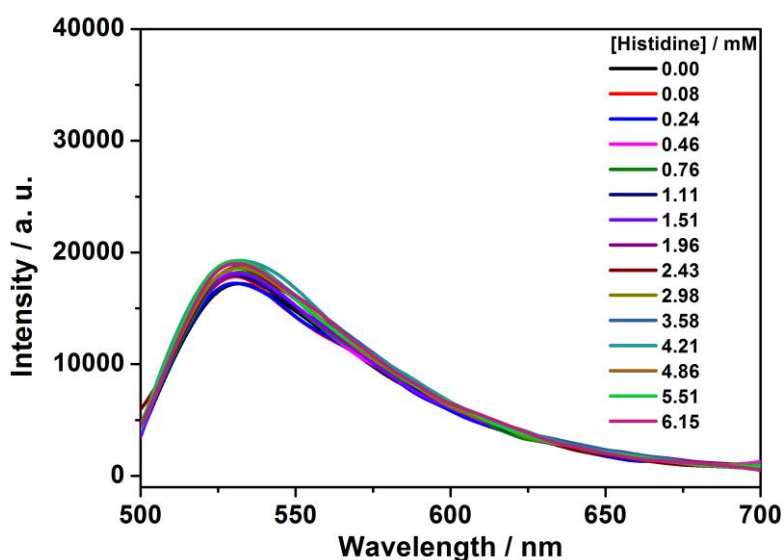

**Fig. S16.** Competitive fluorescence titration of histidine in the presence of AO (1.0  $\mu\text{M}$ )/CP6A (2.5  $\mu\text{M}$ ) in 10 mM PBS buffer at pH 7.4,  $\lambda_{\text{ex}} = 493 \text{ nm}$ . The recovery of fluorescence is too small relative to range of quenching, so no reasonable association constant can be obtained.

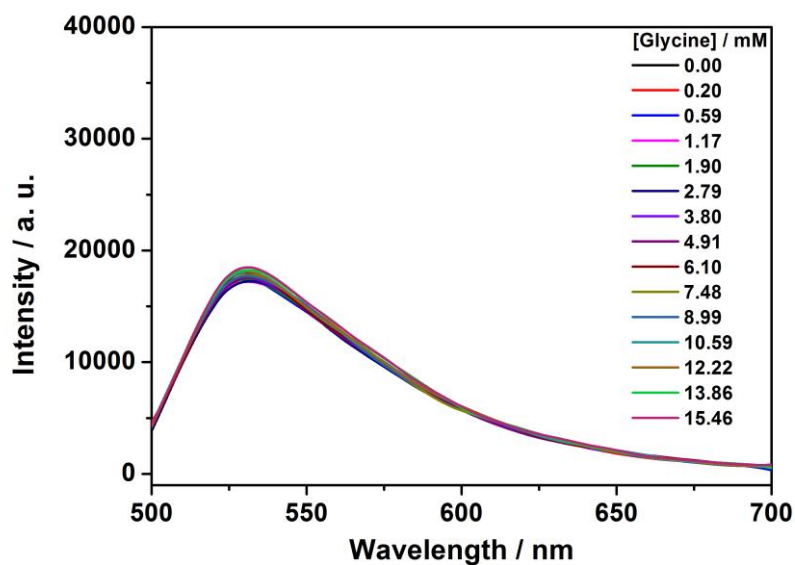

**Fig. S17.** Competitive fluorescence titration of glycine in the presence of AO (1.0 μM)/CP6A (2.5 μM) in 10 mM PBS buffer at pH 7.4,  $\lambda_{ex} = 493$  nm. The recovery of fluorescence is too small relative to range of quenching, so no reasonable association constant can be obtained.

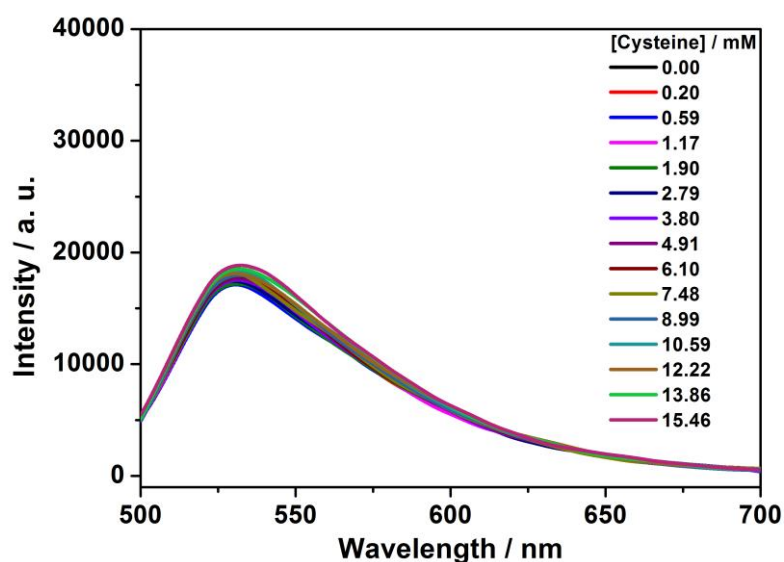

**Fig. S18.** Competitive fluorescence titration of cysteine in the presence of AO (1.0 μM)/CP6A (2.5 μM) in 10 mM PBS buffer at pH 7.4,  $\lambda_{ex} = 493$  nm. The recovery of fluorescence is too small relative to range of quenching, so no reasonable association constant can be obtained.



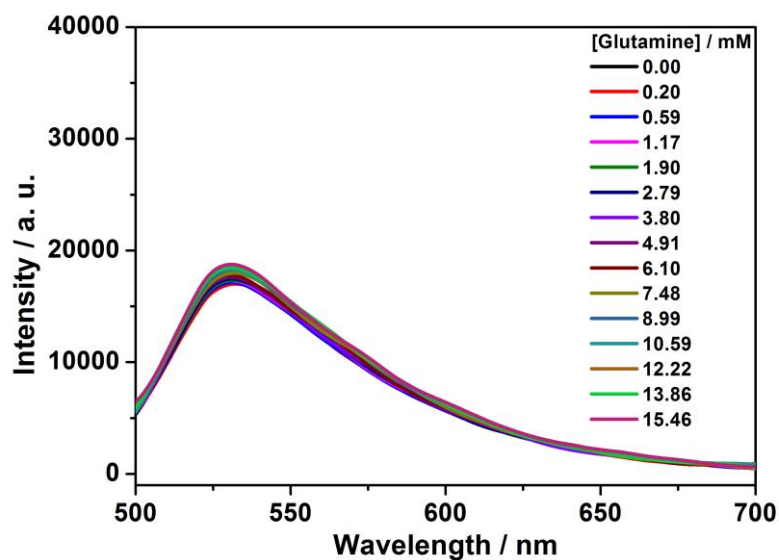

**Fig. S19.** Competitive fluorescence titration of glutamine in the presence of AO (1.0  $\mu\text{M}$ )/CP6A (2.5  $\mu\text{M}$ ) in 10 mM PBS buffer at pH 7.4,  $\lambda_{\text{ex}} = 493$  nm. The recovery of fluorescence is too small relative to range of quenching, so no reasonable association constant can be obtained.

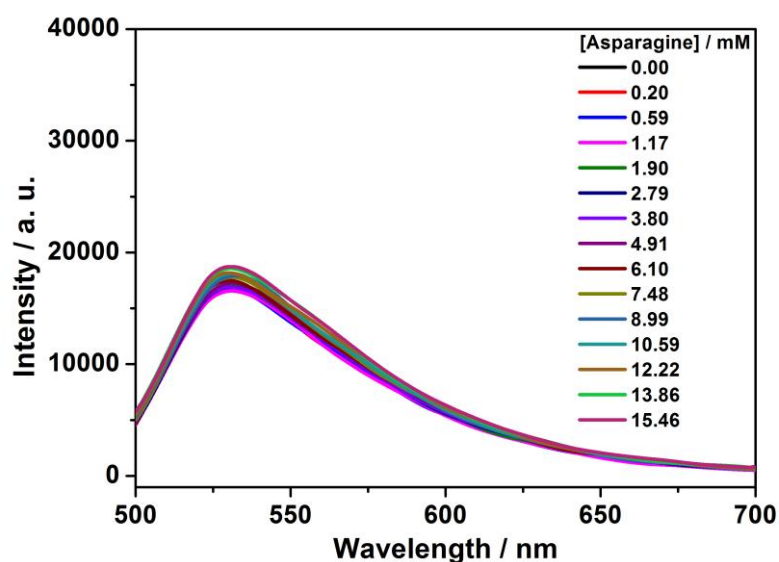

**Fig. S20.** Competitive fluorescence titration of asparagine in the presence of AO (1.0  $\mu\text{M}$ )/CP6A (2.5  $\mu\text{M}$ ) in 10 mM PBS buffer at pH 7.4,  $\lambda_{\text{ex}} = 493$  nm. The recovery of fluorescence is too small relative to range of quenching, so no reasonable association constant can be obtained.

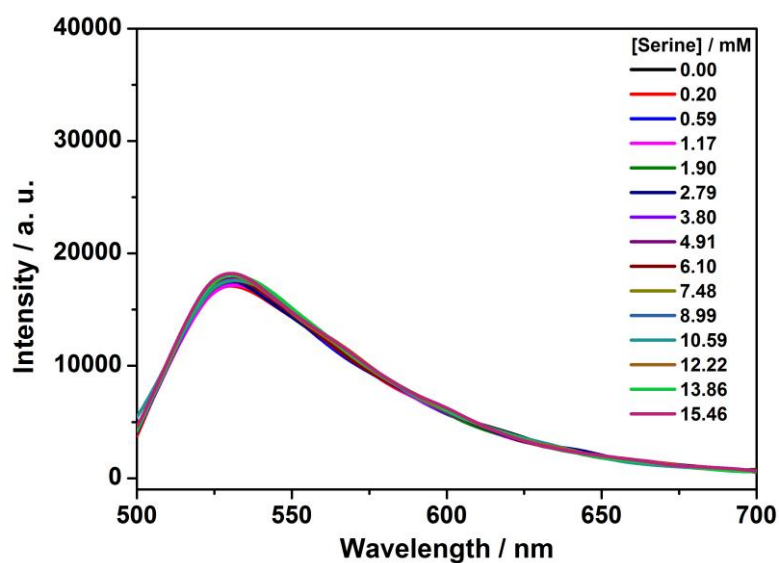

**Fig. S21.** Competitive fluorescence titration of serine in the presence of AO (1.0  $\mu\text{M}$ )/CP6A (2.5  $\mu\text{M}$ ) in 10 mM PBS buffer at pH 7.4,  $\lambda_{\text{ex}} = 493$  nm. The recovery of fluorescence is too small relative to range of quenching, so no reasonable association constant can be obtained.

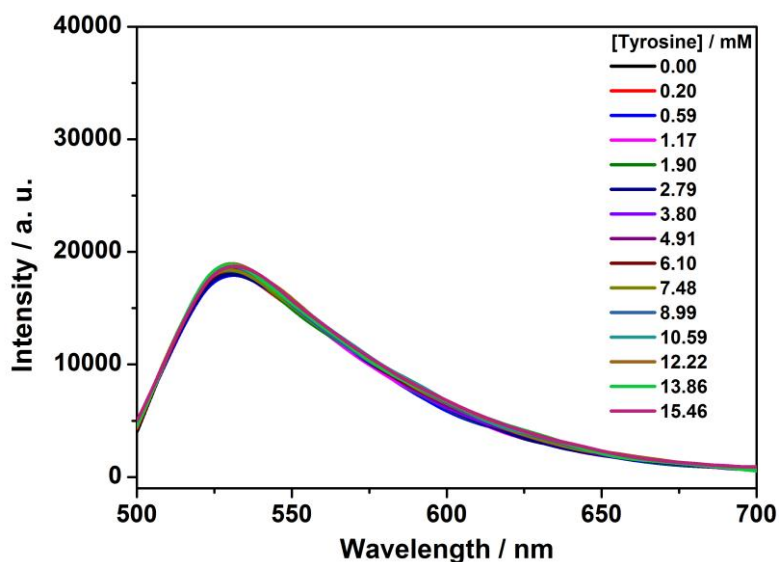

**Fig. S22.** Competitive fluorescence titration of tyrosine in the presence of AO (1.0  $\mu\text{M}$ )/CP6A (2.5  $\mu\text{M}$ ) in 10 mM PBS buffer at pH 7.4,  $\lambda_{\text{ex}} = 493$  nm. The recovery of fluorescence is too small relative to range of quenching, so no reasonable association constant can be obtained.

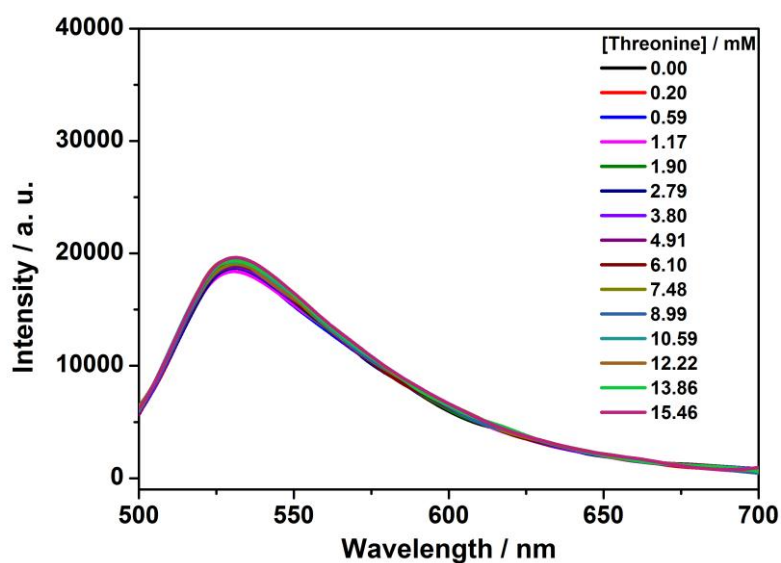

**Fig. S23.** Competitive fluorescence titration of threonine in the presence of AO (1.0 μM)/CP6A (2.5 μM) in 10 mM PBS buffer at pH 7.4,  $\lambda_{ex} = 493$  nm. The recovery of fluorescence is too small relative to range of quenching, so no reasonable association constant can be obtained.

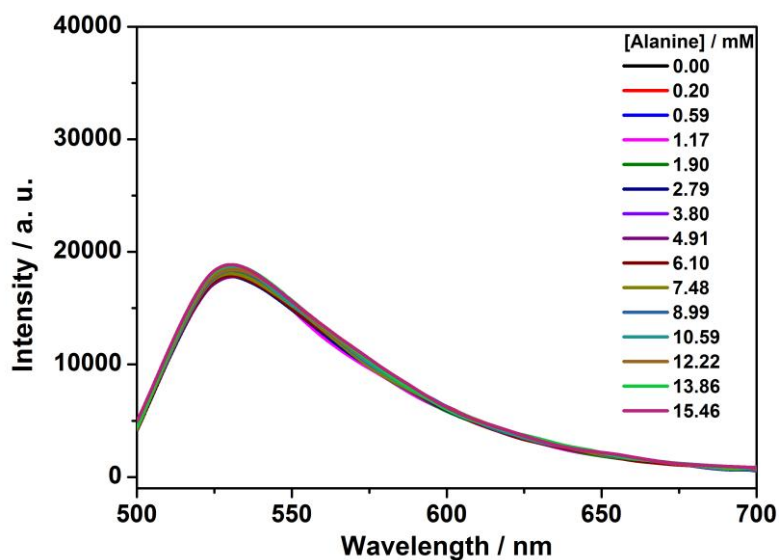

**Fig. S24.** Competitive fluorescence titration of alanine in the presence of AO (1.0 μM)/CP6A (2.5 μM) in 10 mM PBS buffer at pH 7.4,  $\lambda_{ex} = 493$  nm. The recovery of fluorescence is too small relative to range of quenching, so no reasonable association constant can be obtained.

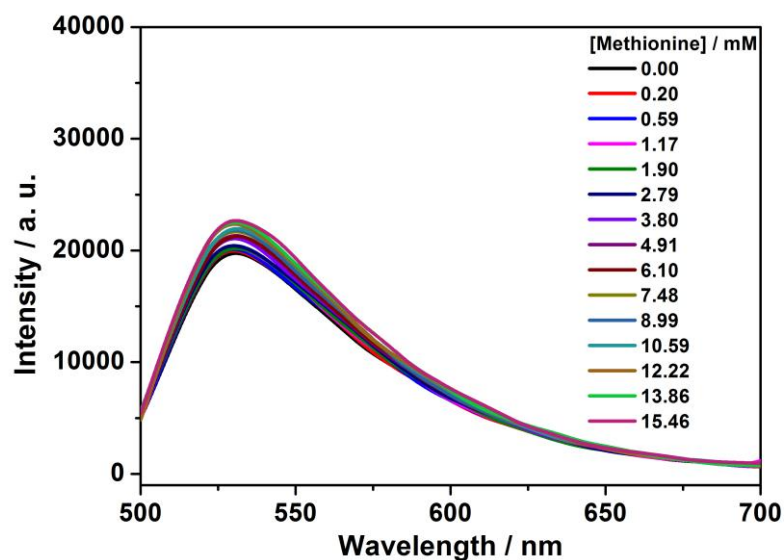

**Fig. S25.** Competitive fluorescence titration of methionine in the presence of AO (1.0 μM)/CP6A (2.5 μM) in 10 mM PBS buffer at pH 7.4,  $\lambda_{ex} = 493$  nm. The recovery of fluorescence is too small relative to range of quenching, so no reasonable association constant can be obtained.

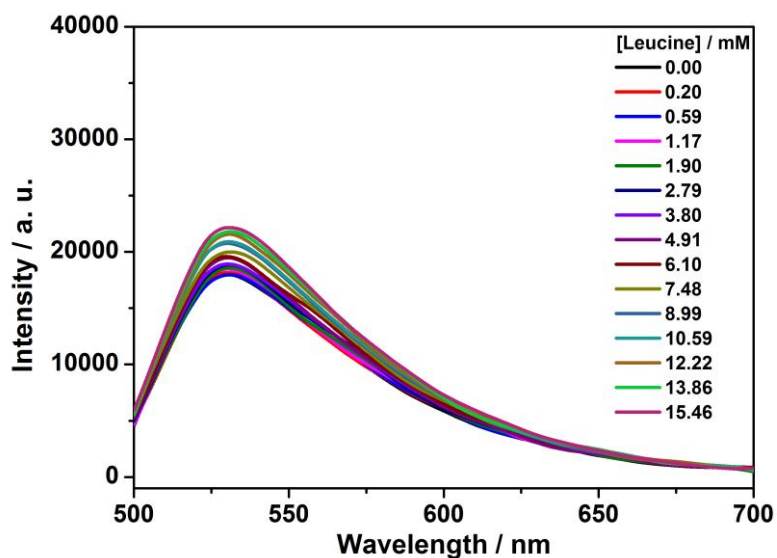

**Fig. S26.** Competitive fluorescence titration of leucine in the presence of AO (1.0 μM)/CP6A (2.5 μM) in 10 mM PBS buffer at pH 7.4,  $\lambda_{ex} = 493$  nm. The recovery of fluorescence is too small relative to range of quenching, so no reasonable association constant can be obtained.

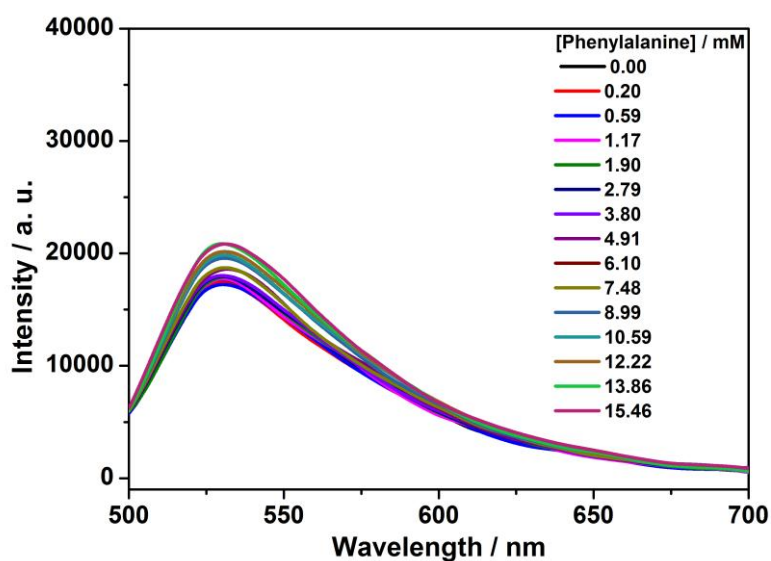

**Fig. S27.** Competitive fluorescence titration of phenylalanine in the presence of AO (1.0  $\mu\text{M}$ )/CP6A (2.5  $\mu\text{M}$ ) in 10 mM PBS buffer at pH 7.4,  $\lambda_{\text{ex}} = 493$  nm. The recovery of fluorescence is too small relative to range of quenching, so no reasonable association constant can be obtained.

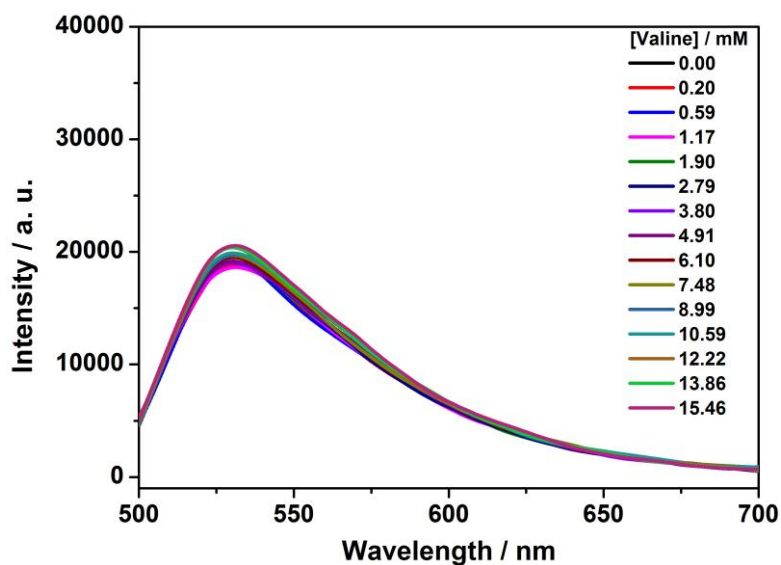

**Fig. S28.** Competitive fluorescence titration of valine in the presence of AO (1.0  $\mu\text{M}$ )/CP6A (2.5  $\mu\text{M}$ ) in 10 mM PBS buffer at pH 7.4,  $\lambda_{\text{ex}} = 493$  nm. The recovery of fluorescence is too small relative to range of quenching, so no reasonable association constant can be obtained.

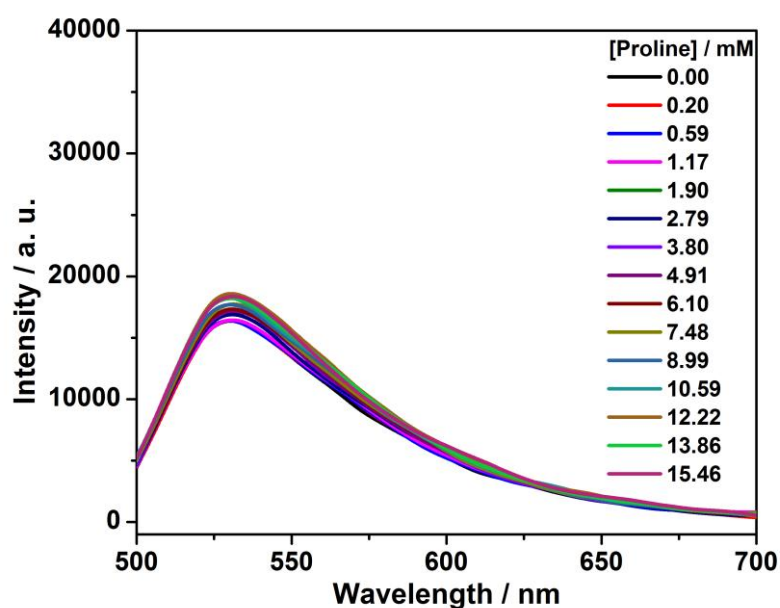

**Fig. S29.** Competitive fluorescence titration of proline in the presence of AO (1.0  $\mu\text{M}$ )/CP6A (2.5  $\mu\text{M}$ ) in 10 mM PBS buffer at pH 7.4,  $\lambda_{\text{ex}} = 493$  nm. The recovery of fluorescence is too small relative to range of quenching, so no reasonable association constant can be obtained.

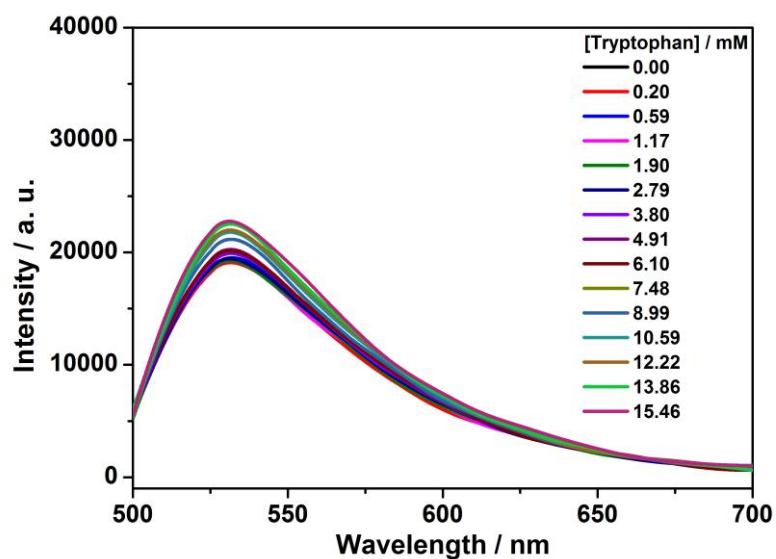

**Fig. S30.** Competitive fluorescence titration of tryptophan in the presence of AO (1.0  $\mu\text{M}$ )/CP6A (2.5  $\mu\text{M}$ ) in 10 mM PBS buffer at pH 7.4,  $\lambda_{\text{ex}} = 493$  nm. The recovery of fluorescence is too small relative to range of quenching, so no reasonable association constant can be obtained.

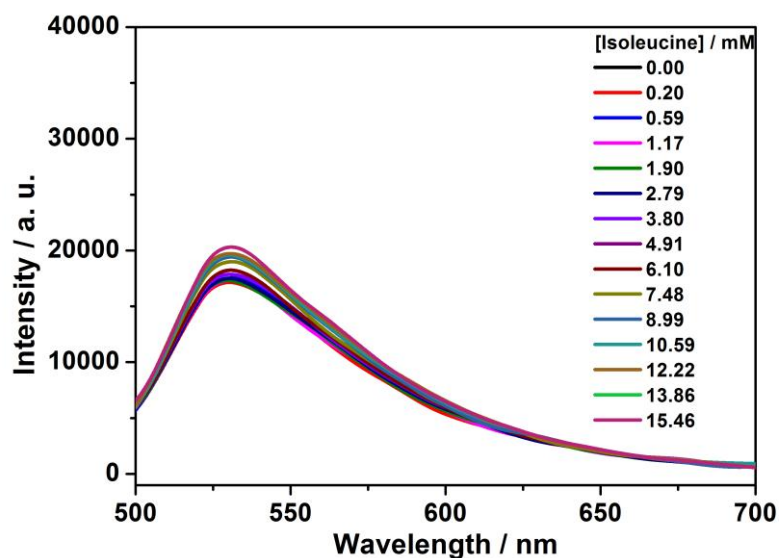

**Fig. S31.** Competitive fluorescence titration of isoleucine in the presence of AO (1.0  $\mu\text{M}$ )/CP6A (2.5  $\mu\text{M}$ ) in 10 mM PBS buffer at pH 7.4,  $\lambda_{\text{ex}} = 493$  nm. The recovery of fluorescence is too small relative to range of quenching, so no reasonable association constant can be obtained.

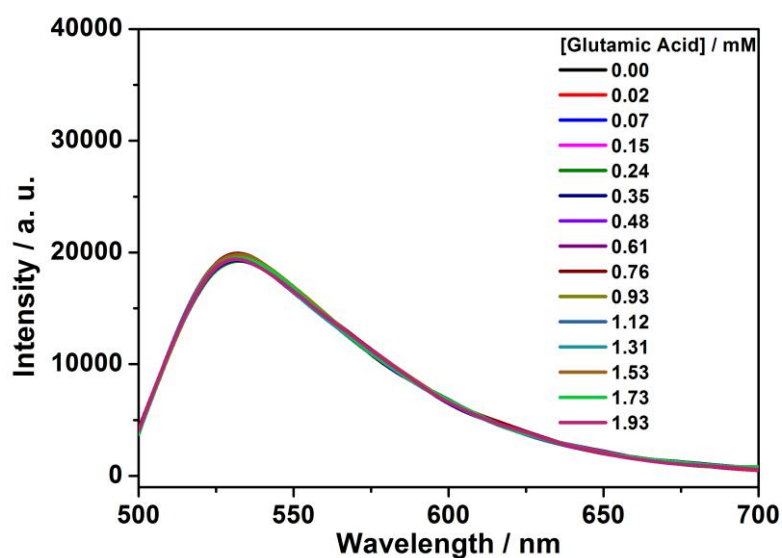

**Fig. S32.** Competitive fluorescence titration of glutamic acid in the presence of AO (1.0  $\mu\text{M}$ )/CP6A (2.5  $\mu\text{M}$ ) in 10 mM PBS buffer at pH 7.4,  $\lambda_{\text{ex}} = 493$  nm. The recovery of fluorescence is too small relative to range of quenching, so no reasonable association constant can be obtained.

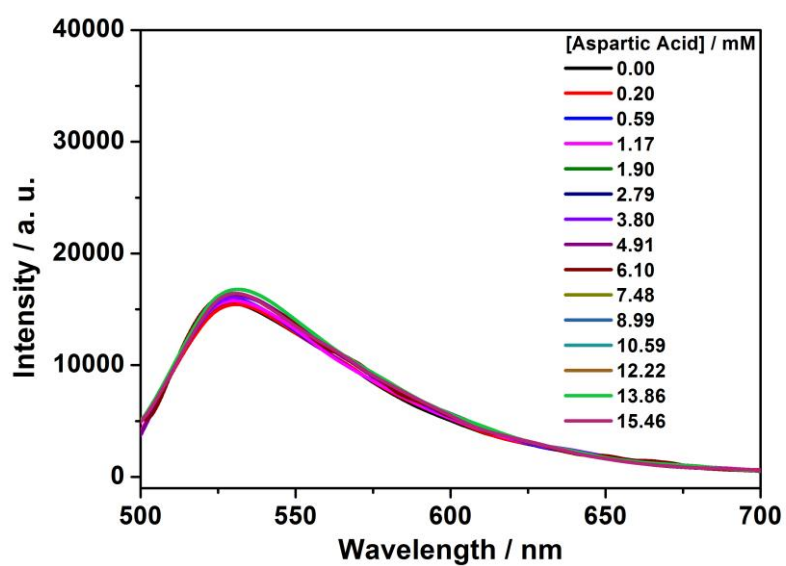

**Fig. S33.** Competitive fluorescence titration of aspartic acid in the presence of AO (1.0  $\mu\text{M}$ )/CP6A (2.5  $\mu\text{M}$ ) in 10 mM PBS buffer at pH 7.4,  $\lambda_{\text{ex}} = 493$  nm. The recovery of fluorescence is too small relative to range of quenching, so no reasonable association constant can be obtained.



### 3.3 Binding of CP6A with Ang I II and Cpep I II III.

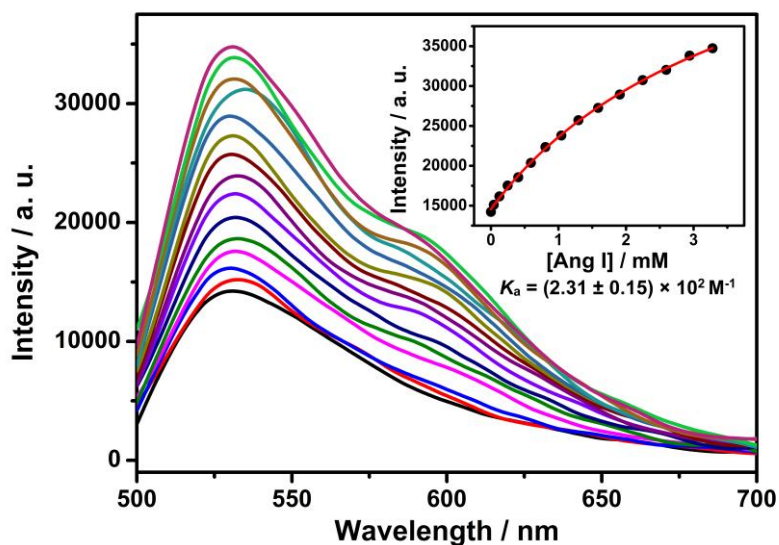

**Fig. S34.** Competitive fluorescence titration of Ang I in the presence of AO (1.0  $\mu\text{M}$ )/CP6A (2.5  $\mu\text{M}$ ) in 10 mM PBS buffer at pH 7.4,  $\lambda_{\text{ex}} = 493$  nm. Insert: the associated competitive titration curve at  $\lambda_{\text{em}} = 530$  nm and fit according a 1:1 competitive binding model.

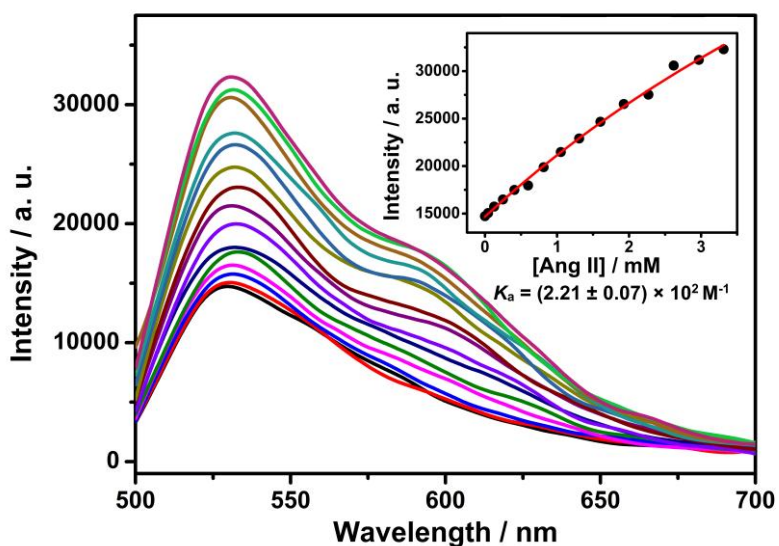

**Fig. S35.** Competitive fluorescence titration of Ang II in the presence of AO (1.0  $\mu\text{M}$ )/CP6A (2.5  $\mu\text{M}$ ) in 10 mM PBS buffer at pH 7.4,  $\lambda_{\text{ex}} = 493$  nm. Insert: the associated competitive titration curve at  $\lambda_{\text{em}} = 530$  nm and fit according a 1:1 competitive binding model.

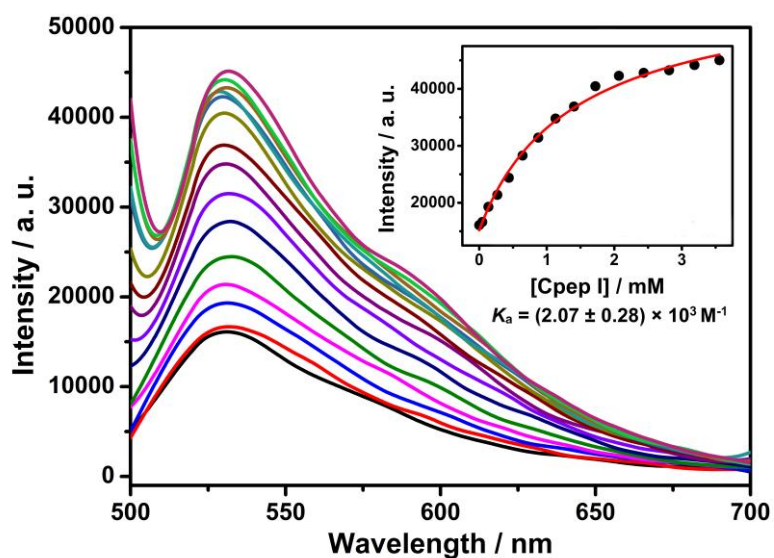

**Fig. S36.** Competitive fluorescence titration of Cpep I in the presence of AO (1.0  $\mu\text{M}$ )/CP6A (2.5  $\mu\text{M}$ ) in 10 mM PBS buffer at pH 7.4,  $\lambda_{\text{ex}} = 493$  nm. Insert: the associated competitive titration curve at  $\lambda_{\text{em}} = 530$  nm and fit according a 1:1 competitive binding model.

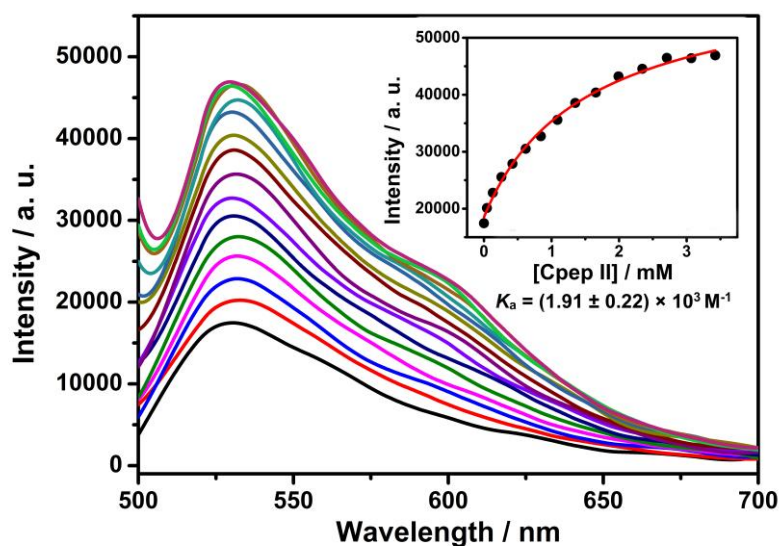

**Fig. S37.** Competitive fluorescence titration of Cpep II in the presence of AO (1.0  $\mu\text{M}$ )/CP6A (2.5  $\mu\text{M}$ ) in 10 mM PBS buffer at pH 7.4,  $\lambda_{\text{ex}} = 493$  nm. Insert: the associated competitive titration curve at  $\lambda_{\text{em}} = 530$  nm and fit according a 1:1 competitive binding model.

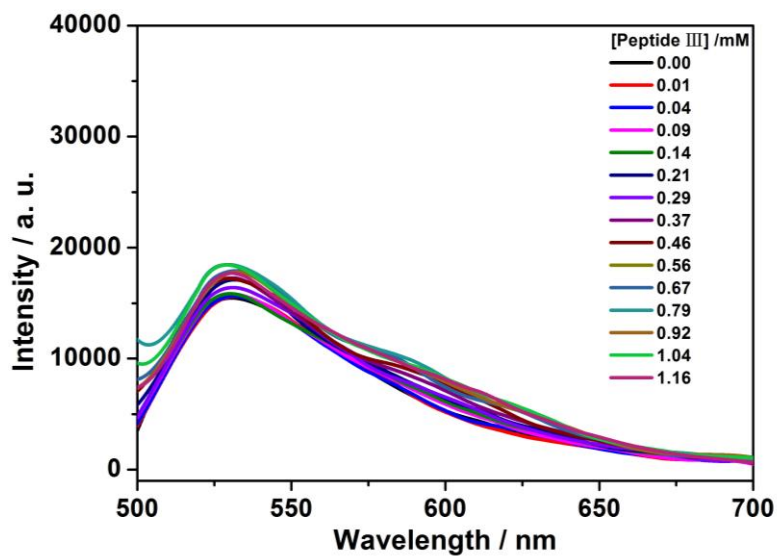

**Fig. S38** Competitive fluorescence titration of Cpep III in the presence of AO (1.0 μM)/CP6A (2.5 μM) in 10 mM PBS buffer at pH 7.4,  $\lambda_{\text{ex}} = 493$  nm. The recovery of fluorescence is too small relative to range of quenching, so no reasonable association constant can be obtained.

### 3.4 Optimized geometries of Arg with CP6A

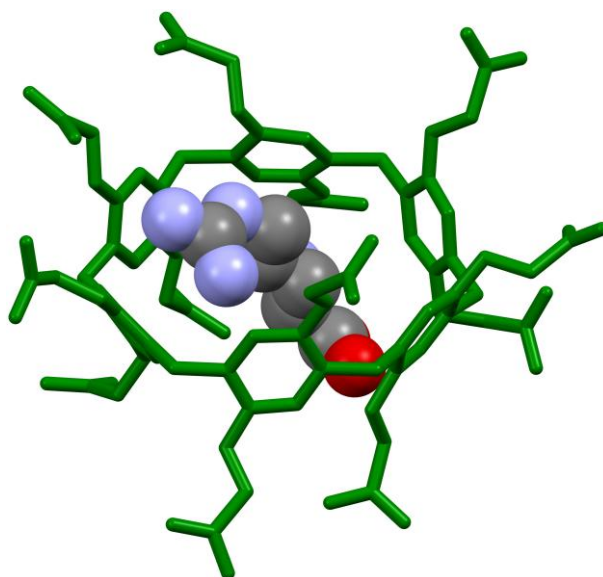

**Fig. S39.** Optimized structure of MM2 energy-minimized model of Arg/CP6A complex.

#### 4 The standard curves of Ang III as studied by HPLC.

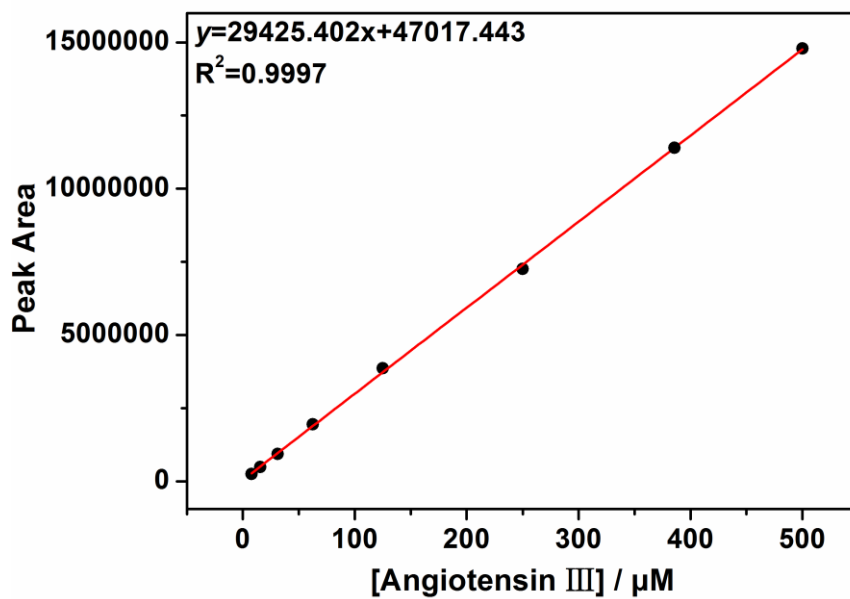

**Fig. S40.** The calibration curves obtained by HPLC and used for calculating the Ang III concentration in metabolic stability studies, ranged in the concentrations 7.81-500.00  $\mu\text{M}$ .

## References

- 1 Z. Xu, S. Jia, W. Wang, Z. Yuan, B. Jan Ravoo and D. S. Guo, *Nat Chem*, 2019, 11, 86-93.
- 2 J. Chen, Q. Meng, Y. Zhang, M. Dong, L. Zhao, Y. Zhang, L. Chen, Y. Chai, Z. Meng, C. Wang, X. Jia and C. Li, *Angew Chem Int Ed Engl*, 2021, 60, 11288-11293.
- 3 J. Chen, Y. Zhang, Y. Chai, Z. Meng, Y. Zhang, L. Chen, D. Quan, Y. Wang, Q. Meng and C. Li, *Chem Sci*, 2021, 12, 5202-5208.
- 4 T. Wang, Z. Meng, Z. Kang, G. Ding, B. Zhao, Z. Han, Z. Zheng, C. Wang and Q. Meng, *ACS Biomater Sci Eng*, 2020, 6, 6778-6789.
